# Supplementary material for: Diagnostic value of artificial intelligence based on computed tomography (CT) density in benign and malignant pulmonary nodules: a retrospective investigation
Source: PeerJ. 2024 Jan 2;12:e16577. doi: 10.7717/peerj.16577 (PMC10768667; doi:10.7717/peerj.16577)
Supplement: Supplemental Information 1 [file peerj-12-16577-s001.xls]

## Sheet: General information
Patiennt	Gender	Age	Smoking history	Family history	Previously diagnosed as emphysema	Area
1	M	48	Yes	Yes	Yes	Subpleural
2	F	46	Yes	No	No	Peripheral
3	M	48	Yes	No	No	Intermediate
4	M	49	No	No	No	Hilar
5	M	54	No	No	Yes	Subpleural
6	F	47	No	No	No	Intermediate
7	M	57	Yes	No	No	Hilar
8	M	59	Yes	No	No	Subpleural
9	M	43	No	No	No	Peripheral
10	M	49	No	No	Yes	Intermediate
11	F	48	No	No	No	Hilar
12	M	61	Yes	No	No	Hilar
13	M	57	Yes	No	Yes	Intermediate
14	F	47	Yes	No	Yes	Hilar
15	M	55	Yes	Yes	No	Hilar
16	M	48	Yes	Yes	No	Subpleural
17	F	56	No	Yes	No	Subpleural
18	F	64	No	Yes	No	Intermediate
19	M	45	No	Yes	Yes	Subpleural
20	M	49	No	Yes	Yes	Peripheral
21	M	35	No	No	No	Intermediate
22	M	52	Yes	No	No	Hilar
23	M	49	Yes	No	No	Subpleural
24	M	47	Yes	No	No	Peripheral
25	M	44	Yes	No	No	Intermediate
26	M	35	Yes	No	Yes	Hilar
27	M	63	No	No	Yes	Subpleural
28	M	56	No	No	Yes	Peripheral
29	F	55	No	No	No	Intermediate
30	M	49	No	No	No	Intermediate
31	M	51	No	No	No	Peripheral
32	M	57	No	No	No	Intermediate
33	F	37	Yes	No	No	Hilar
34	F	52	Yes	No	No	Intermediate
35	M	55	Yes	No	No	Subpleural
36	M	48	No	No	Yes	Subpleural
37	M	47	No	No	Yes	Subpleural
38	M	49	Yes	No	Yes	Hilar
39	F	51	Yes	No	No	Hilar
40	M	47	No	No	No	Hilar
41	M	58	No	No	No	Intermediate
42	M	61	Yes	Yes	No	Subpleural
43	F	49	Yes	No	No	Peripheral
44	M	58	No	No	Yes	Intermediate
45	F	47	Yes	No	Yes	Hilar
46	F	52	No	No	Yes	Intermediate
47	F	53	No	No	Yes	Peripheral
48	M	46	Yes	No	No	Intermediate
49	M	49	Yes	No	No	Hilar
50	F	54	No	No	No	Intermediate
51	M	52	No	No	Yes	Subpleural
52	F	63	Yes	Yes	No	Intermediate
53	M	54	Yes	No	No	Subpleural
54	F	53	No	No	No	Intermediate
55	M	43	No	No	Yes	Subpleural
56	M	50	Yes	No	Yes	Peripheral
57	M	50	Yes	No	No	Intermediate
58	M	50	Yes	No	No	Hilar
59	M	52	Yes	No	No	Intermediate
60	M	52	Yes	No	No	Hilar
61	M	57	No	No	No	Intermediate
62	M	54	No	No	Yes	Peripheral
63	M	54	Yes	No	Yes	Hilar
64	F	56	Yes	No	No	Subpleural
65	F	57	No	No	Yes	Hilar
66	F	58	Yes	No	No	Hilar
67	F	49	Yes	No	No	Hilar
68	F	52	No	No	No	Peripheral
69	M	52	No	Yes	Yes	Hilar
70	M	57	Yes	Yes	Yes	Subpleural
71	M	54	Yes	No	Yes	Subpleural
72	M	46	Yes	No	Yes	Intermediate
73	M	49	No	No	No	Intermediate
74	M	54	No	No	No	Intermediate
75	F	52	Yes	No	No	Intermediate
76	F	63	Yes	Yes	No	Intermediate
77	F	67	No	No	No	Hilar
78	F	68	No	No	Yes	Intermediate
79	F	69	Yes	No	No	Hilar
80	F	70	Yes	No	No	Intermediate
81	M	74	No	No	Yes	Peripheral
82	M	71	No	No	Yes	Hilar
83	M	72	Yes	No	No	Subpleural
84	M	57	Yes	No	No	Subpleural
85	M	58	No	No	No	Peripheral
86	M	47	No	No	Yes	Hilar
87	M	52	Yes	No	Yes	Subpleural
88	M	53	Yes	No	Yes	Subpleural
89	M	46	No	No	No	Peripheral
90	M	49	No	No	No	Peripheral
91	M	54	Yes	No	No	Intermediate
92	M	52	No	No	No	Subpleural
93	M	56	No	Yes	No	Peripheral
94	F	64	Yes	Yes	No	Intermediate
95	F	45	Yes	No	Yes	Hilar
96	F	49	Yes	No	No	Subpleural
97	M	35	No	No	Yes	Peripheral
98	M	52	No	No	Yes	Peripheral
99	M	49	No	No	No	Intermediate
100	F	47	No	No	No	Hilar
101	F	44	No	No	Yes	Intermediate
102	M	35	No	No	Yes	Hilar
103	M	55	Yes	No	Yes	Intermediate
104	M	48	Yes	No	No	Intermediate
105	M	47	No	Yes	No	Subpleural
106	M	49	No	No	No	Hilar
107	M	51	Yes	No	No	Hilar
108	M	46	No	No	Yes	Peripheral
109	M	48	Yes	Yes	No	Intermediate
110	M	49	No	No	No	Hilar
111	F	54	No	No	No	Intermediate
112	F	47	Yes	No	Yes	Subpleural
113	F	57	No	No	Yes	Intermediate
114	M	59	Yes	No	No	Peripheral
115	M	43	Yes	No	No	Subpleural
116	F	70	No	Yes	No	Intermediate
117	F	55	No	No	Yes	Subpleural
118	F	48	Yes	No	Yes	Subpleural
119	F	47	No	No	No	Peripheral
120	F	49	No	No	No	Subpleural
121	F	51	Yes	No	No	Peripheral
122	F	76	Yes	No	Yes	Subpleural
123	F	68	No	No	Yes	Intermediate
124	F	59	No	No	No	Subpleural
125	F	68	Yes	No	Yes	Peripheral
126	M	47	Yes	No	No	Intermediate
127	M	71	No	No	No	Subpleural
128	M	76	No	Yes	No	Hilar
129	F	60	Yes	Yes	No	Hilar
130	F	58	Yes	Yes	Yes	Subpleural

## Sheet: characteristics of PN
PN	Density	Diameter(mm)	Pathological type
1	Malignant nodule	23	Pathological type
2	Malignant nodule	25	Malignant nodule
3	Malignant nodule	30	Malignant nodule
4	Solid	21	Malignant nodule
5	Part-solid	20	Malignant nodule
6	Ground-glass	17	Malignant nodule
7	Malignant nodule	23	Malignant nodule
8	Solid	25	Benign
9	Malignant nodule	28	Malignant nodule
10	Solid	26	Benign
11	Solid	11	Malignant nodule
12	Malignant nodule	24	Benign
13	Solid	30	Malignant nodule
14	Part-solid	17	Benign
15	Ground-glass	19	Malignant nodule
16	Malignant nodule	20	Benign
17	Malignant nodule	18	Malignant nodule
18	Solid	21	Benign
19	Part-solid	23	Malignant nodule
20	Ground-glass	24	Malignant nodule
21	Ground-glass	25	Malignant nodule
22	Malignant nodule	17	Malignant nodule
23	Malignant nodule	14	Malignant nodule
24	Solid	11	Benign
25	Part-solid	5	Malignant nodule
26	Ground-glass	6	Benign
27	Ground-glass	8	Malignant nodule
28	Malignant nodule	3	Benign
29	Solid	1	Benign
30	Part-solid	1	Benign
31	Solid	0.9	Malignant nodule
32	Part-solid	2	Malignant nodule
33	Malignant nodule	2.5	Malignant nodule
34	Malignant nodule	3.8	Malignant nodule
35	Solid	3.9	Benign
36	Part-solid	4	Malignant nodule
37	Ground-glass	5	Malignant nodule
38	Ground-glass	1.9	Malignant nodule
39	Malignant nodule	4.9	Malignant nodule
40	Malignant nodule	8.7	Malignant nodule
41	Solid	4.7	Malignant nodule
42	Part-solid	8.9	Malignant nodule
43	Ground-glass	11	Malignant nodule
44	Ground-glass	12.8	Malignant nodule
45	Malignant nodule	15.8	Benign
46	Solid	16.9	Benign
47	Part-solid	11	Benign
48	Solid	12	Benign
49	Part-solid	13	Benign
50	Malignant nodule	10.8	Benign
51	Malignant nodule	8.7	Malignant nodule
52	Malignant nodule	9	Benign
53	Solid	11	Malignant nodule
54	Part-solid	24	Benign
55	Ground-glass	25	Benign
56	Malignant nodule	17	Malignant nodule
57	Malignant nodule	14	Benign
58	Malignant nodule	11	Malignant nodule
59	Malignant nodule	25.7	Benign
60	Solid	23	Malignant nodule
61	Part-solid	24.8	Malignant nodule
62	Solid	24.9	Malignant nodule
63	Part-solid	21	Malignant nodule
64	Malignant nodule	20	Malignant nodule
65	Malignant nodule	19	Malignant nodule
66	Malignant nodule	15	Benign
67	Solid	18	Benign
68	Part-solid	13	Malignant nodule
69	Solid	11	Malignant nodule
70	Part-solid	7	Malignant nodule
71	Solid	8.6	Malignant nodule
72	Part-solid	9	Malignant nodule
73	Malignant nodule	8.7	Malignant nodule
74	Malignant nodule	6.8	Benign
75	Malignant nodule	5.7	Benign
76	Solid	4	Malignant nodule
77	Part-solid	12	Malignant nodule
78	Malignant nodule	11	Malignant nodule
79	Solid	13	Malignant nodule
80	Part-solid	9	Malignant nodule
81	Solid	10	Benign
82	Part-solid	5.9	Benign
83	Solid	8.6	Malignant nodule
84	Part-solid	7	Malignant nodule
85	Malignant nodule	5	Malignant nodule
86	Malignant nodule	4.7	Malignant nodule
87	Malignant nodule	3.9	Malignant nodule
88	Malignant nodule	2.9	Benign
89	Solid	2.6	Benign
90	Part-solid	4.9	Benign
91	Ground-glass	10	Benign
92	Malignant nodule	11	Benign
93	Solid	24.9	Malignant nodule
94	Malignant nodule	26.9	Malignant nodule
95	Solid	19.7	Malignant nodule
96	Solid	11.8	Malignant nodule
97	Malignant nodule	14.8	Malignant nodule
98	Solid	10.8	Malignant nodule
99	Part-solid	7.9	Malignant nodule
100	Ground-glass	4.2	Benign
101	Malignant nodule	2.6	Malignant nodule
102	Malignant nodule	1.7	Benign
103	Solid	2.7	Malignant nodule
104	Part-solid	3.9	Benign
105	Ground-glass	2.7	Benign
106	Ground-glass	1.8	Malignant nodule
107	Malignant nodule	9.8	Benign
108	Solid	7.6	Malignant nodule
109	Part-solid	5.9	Benign
110	Ground-glass	11.9	Malignant nodule
111	Malignant nodule	21.8	Malignant nodule
112	Solid	24.1	Malignant nodule
113	Malignant nodule	3.6	Malignant nodule
114	Solid	5.9	Malignant nodule
115	Solid	23	Malignant nodule
116	Malignant nodule	21	Benign
117	Solid	20	Malignant nodule
118	Part-solid	12.8	Benign
119	Ground-glass	14.8	Malignant nodule
120	Malignant nodule	17.9	Benign
121	Malignant nodule	19.8	Malignant nodule
122	Solid	20.7	Benign
123	Part-solid	13.8	Malignant nodule
124	Ground-glass	11.8	Malignant nodule
125	Ground-glass	27	Malignant nodule
126	Malignant nodule	23.8	Benign
127	Malignant nodule	21.8	Malignant nodule
128	Solid	30	Benign
129	Part-solid	23	Benign
130	Ground-glass	25	Benign
131	Ground-glass	17	Malignant nodule
132	Malignant nodule	16	Benign
133	Malignant nodule	20	Malignant nodule
134	Malignant nodule	27.8	Malignant nodule
135	Malignant nodule	17.9	Malignant nodule
136	Malignant nodule	24	Benign
137	Malignant nodule	25	Malignant nodule
138	Malignant nodule	17	Benign
139	Solid	12。7	Benign
140	Solid	13.8	Benign
141	Malignant nodule	12.8	Malignant nodule
142	Solid	13	Benign
143	Part-solid	14.7	Malignant nodule
144	Ground-glass	14.9	Malignant nodule
145	Malignant nodule	17.6	Malignant nodule
146	Malignant nodule	25.8	Benign
147	Solid	21	Malignant nodule
